# Supplementary material
Source: PubMed Central journal article supplement (PMC5087126)
Supplement: NIHMS822691-supplement-Supplemental.pdf [file NIHMS822691-supplement-Supplemental.pdf]

## Supplementary Materials for

### **Innate immune memory and homeostasis may be conferred through crosstalk between the TLR3 and TLR7 pathways**

Bing Liu, Qian Liu, Lei Yang, Sucheendra K. Palaniappan, Ivet Bahar,  
P. S. Thiagarajan,\* Jeak Ling Ding\*

\*Corresponding author. Email: thiagu@hms.harvard.edu (P.S.T.); dbsdjl@nus.edu.sg (J.L.D.)

Published 12 July 2016, *Sci. Signal.* **9**, ra70 (2016)  
DOI: 10.1126/scisignal.aac9340

#### **This PDF file includes:**

Text

Fig. S1. The reaction schemas for the TLR3 and TLR7 signaling networks.

Fig. S2. Knockout simulation results.

Fig. S3. Combinatorial knockout simulation results.

Fig. S4. Analysis of the abundances of *Il1a*, *Il10*, and *Csf3* mRNAs in response to in silico and empirical perturbation of the JAK-STAT pathway.

Fig. S5. Incremental induction of *Stat1* expression in BMDMs derived from *Stat1<sup>ind</sup>* mice.

Fig. S6. Analysis of the efficiency of knockdown of *Stat1*.

Table S1. List of species and their initial concentrations.

Table S2. List of parameters and their values.

Reference (78)

## The I1-FFL

The feed-forward loop (FFL) is one of the most common network motifs in biomolecular regulatory networks (66, 68). For example, suppose that transcription factor X stimulates expression of the gene encoding transcription factor Y and that both X and Y stimulate the expression of a target gene encoding Z. Then, X, Y, and Z form a FFL. Because each of the three transcriptional interactions in a FFL can be either positive (activation) or negative (inhibition), there are eight possible combinations of positive or negative interactions. They have been named as coherent or incoherent type 1 to 4 FFLs (see below). The abundance and functionality of different FFLs have been studied and discussed previously (78). Of particular interest in our context is the inherent type 1 FFL (I1-FFL), a circuit in which X activates the genes that encode Z and Y, and Y inhibits the genes encoding Z. It has been previously noted (27) that the roles of a I1-FFL include: (i) shortening of gene-circuit response time; (ii) generation of gene expression pulses; (iii) distinguishing between time-varying inputs; (iv) filtering out noise; (v) detecting the fold-change in the abundance of an input signal; and (vi) generating nonmonotonic input-output relations. The behavior resulting from (vi) is also called a biphasic response, which can be time-dependent: as time progresses, the output response initially increases but then subsequently decreases. A biphasic response can also be dose-dependent: Over a certain range of input dose, the output response first increases but subsequently decreases. The parameters that induce biphasic responses are highly limited (77). In the signaling network studied in this work, we showed that the I1-FFL mediated by STAT1 induced a dose-dependent biphasic response, which was crucial to both amplifying the immune response and avoiding an excessive response.

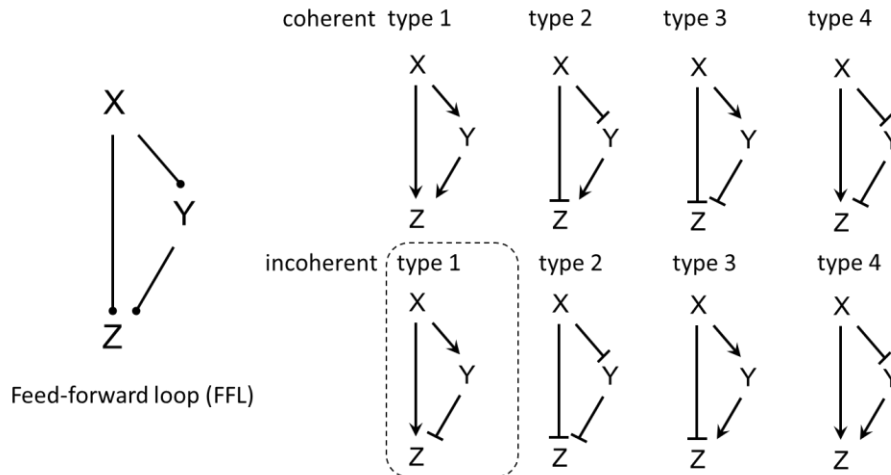

## The ODE model

$$\begin{aligned}
\frac{d([\text{TLR7}])}{dt} &= -k_1[\text{R848}][\text{TLR7}] \\
\frac{d([\text{TLR}^*])}{dt} &= k_1[\text{R848}][\text{TLR7}] - k_2[\text{TLR}^*] \\
\frac{d([\text{MyD88}^*])}{dt} &= k_3[\text{TLR7}^*][\text{MyD88}] - k_4[\text{MyD88}^*][\text{IRAK1/4}][\text{TRAF6}] \\
\frac{d([\text{MyD88}])}{dt} &= -k_3[\text{TLR7}^*][\text{MyD88}] + k_7[\text{MyD88}^*:\text{IRAK1/4}:\text{TRAF6}] \\
\frac{d([\text{IRAK1/4}])}{dt} &= k_{19}[\text{IRAK1/4}^*:\text{TRAF6}] - k_4[\text{MyD88}^*][\text{IRAK1/4}][\text{TRAF6}] \\
\frac{d([\text{TRAF6}])}{dt} &= k_{19}[\text{IRAK1/4}^*:\text{TRAF6}] - k_4[\text{MyD88}^*][\text{IRAK1/4}][\text{TRAF6}] - k_{26}[\text{TRAF6}][\text{A20}] + k_{27}[\text{TRAF6:A20}] \\
&\quad - k_{60}[\text{TRIF}^*][\text{TRADD:FADD:RIP1:TRAF6}] - k_{70}[\text{TRIF}^*:\text{TRADD:FADD:RIP1:TRAF6}] \\
\frac{d([\text{MyD88}^*:\text{IRAK1/4}:\text{TRAF6}])}{dt} &= k_4[\text{MyD88}^*][\text{IRAK1/4}][\text{TRAF6}] - k_7[\text{MyD88}^*:\text{IRAK1/4}:\text{TRAF6}] \\
\frac{d([\text{A20}])}{dt} &= k_{33}[\text{A20mRNA}] - k_{26}[\text{TRAF6}][\text{A20}] + k_{27}[\text{TRAF6:A20}] - k_{37}[\text{A20}] \\
\frac{d([\text{TRAF6:A20}])}{dt} &= k_{26}[\text{TRAF6}][\text{A20}] - k_{27}[\text{TRAF6:A20}] \\
\frac{d([\text{IRAK1/4}^*:\text{TRAF6}])}{dt} &= -k_{19}[\text{IRAK1/4}^*:\text{TRAF6}] + k_7[\text{MyD88}^*:\text{IRAK1/4}:\text{TRAF6}] \\
&\quad - k_9[\text{IRAK1/4}^*:\text{TRAF6}]:[\text{TRAF3}] + k_{28}[\text{IRAK1/4}^*:\text{TRAF6:TRAF3}] \\
\frac{d([\text{TRAF3}])}{dt} &= -k_{144}[\text{IPS1}][\text{TRAF3}] - k_{145}[\text{IPS1}^*:\text{TRAF3}] - k_{58}[\text{TRIF}^*][\text{TRAF3}] + k_{59}[\text{TRIF}^*:\text{TRAF3}] \\
&\quad - k_9[\text{IRAK1/4}^*:\text{TRAF6}]:[\text{TRAF3}] + k_{28}[\text{IRAK1/4}^*:\text{TRAF6:TRAF3}] + k_{69}[\text{TRIF}^*:\text{TRAF3}] \\
\frac{d([\text{MKK1/2}])}{dt} &= k_{24}[\text{MKK1/2}^*] - \frac{k_{10}[\text{Tak1:Tab2:Tab3}^*][\text{MKK1/2}]}{k_{77} + [\text{MKK1/2}]} \\
\frac{d([\text{MKK3/6}])}{dt} &= k_{25}[\text{MKK3/6}^*] - \frac{k_{11}[\text{Tak1:Tab2:Tab3}^*][\text{MKK3/6}]}{k_{78} + [\text{MKK3/6}]} \\
\frac{d([\text{ERK}])}{dt} &= k_{18}[\text{ERK}^*] - k_{12}[\text{ERK}][\text{MKK1/2}] \\
\frac{d([\text{ERK}^*])}{dt} &= -k_{18}[\text{ERK}^*] + k_{12}[\text{ERK}][\text{MKK1/2}] \\
\frac{d([\text{MKK1/2}^*])}{dt} &= -k_{24}[\text{MKK1/2}^*] + \frac{k_{10}[\text{Tak1:Tab2:Tab3}^*][\text{MKK1/2}]}{k_{77} + [\text{MKK1/2}]} \\
\frac{d([\text{MKK3/6}^*])}{dt} &= -k_{25}[\text{MKK3/6}^*] + \frac{k_{11}[\text{Tak1:Tab2:Tab3}^*][\text{MKK3/6}]}{k_{78} + [\text{MKK3/6}]} \\
\frac{d([\text{p38}])}{dt} &= k_{13}[\text{p38}^*] - k_{12}[\text{p38}][\text{MKK3/6}] \\
\frac{d([\text{p38}^*])}{dt} &= -k_{13}[\text{p38}^*] + k_{12}[\text{p38}][\text{MKK3/6}] \\
\frac{d([\text{AP1}])}{dt} &= -k_{20}[\text{ERK}^*][\text{AP1}] - k_{14}[\text{p38}^*][\text{AP1}] - k_{32}[\text{JNK}^*][\text{AP1}] + k_{29}[\text{AP1}^*] \\
\frac{d([\text{NEMO:IKK}\beta:\text{IKK}\alpha])}{dt} &= -k_{75}[\text{NEMO:IKK}\beta:\text{IKK}\alpha][\text{Tak1:Tab2:Tab3}] + k_{21} - k_{49}[\text{NEMO:IKK}\beta:\text{IKK}\alpha] - k_{94}[\text{NEMO:IKK}\beta:\text{IKK}\alpha][\text{AKT}^*] \\
\frac{d([\text{NEMO:IKK}\beta^*:\text{IKK}\alpha])}{dt} &= -k_{15}[\text{NEMO:IKK}\beta^*:\text{IKK}\alpha][\text{I}\kappa\text{B}\alpha:\text{NF}\kappa\text{B}] + k_{54}[\text{NEMO:IKK}\beta^*:\text{IKK}\alpha:\text{NF}\kappa\text{B}:\text{I}\kappa\text{B}\alpha] \\
&\quad - k_{39}[\text{NEMO:IKK}\beta^*:\text{IKK}\alpha][\text{I}\kappa\text{B}\alpha] + k_{40}[\text{NEMO:IKK}\beta^*:\text{IKK}\alpha:\text{I}\kappa\text{B}\alpha] - k_{41}[\text{NEMO:IKK}\beta^*:\text{IKK}\alpha] + k_{30}[\text{NEMO:IKK}\beta^*:\text{IKK}\alpha] \\
&\quad - k_{53}[\text{NEMO:IKK}\beta^*:\text{IKK}\alpha][\text{A20}] + k_{76}[\text{NEMO:IKK}\beta^*:\text{IKK}\alpha:\text{Tak1:Tab2:Tab3}^*] + k_{94}[\text{NEMO:IKK}\beta^*:\text{IKK}\alpha][\text{AKT}^*] \\
\frac{d([\text{I}\kappa\text{B}\alpha])}{dt} &= -k_{17}[\text{I}\kappa\text{B}\alpha][\text{NF}\kappa\text{B}] + k_{47}[\text{I}\kappa\text{B}\alpha\text{mRNA}] - k_{48}[\text{I}\kappa\text{B}\alpha] - k_{39}[\text{I}\kappa\text{B}\alpha][\text{NEMO:IKK}\beta^*:\text{IKK}\alpha] - k_{44}[\text{I}\kappa\text{B}\alpha] + k_{45}[\text{I}\kappa\text{B}\alpha\text{m}] \\
\frac{d([\text{I}\kappa\text{B}\alpha:\text{NF}\kappa\text{B}])}{dt} &= -k_{15}[\text{NEMO:IKK}\beta^*:\text{IKK}\alpha][\text{I}\kappa\text{B}\alpha:\text{NF}\kappa\text{B}] + k_{17}[\text{I}\kappa\text{B}\alpha][\text{NF}\kappa\text{B}] - k_{38}[\text{I}\kappa\text{B}\alpha:\text{NF}\kappa\text{B}] + k_{54}[\text{NEMO:IKK}\beta^*:\text{IKK}\alpha:\text{NF}\kappa\text{B}:\text{I}\kappa\text{B}\alpha] \\
\frac{d([\text{NF}\kappa\text{B}])}{dt} &= -k_{17}[\text{I}\kappa\text{B}\alpha][\text{NF}\kappa\text{B}] - k_{16}[\text{NF}\kappa\text{B}] + k_{38}[\text{I}\kappa\text{B}\alpha:\text{NF}\kappa\text{B}] \\
\frac{d([\text{A20mRNA}])}{dt} &= k_{52}[\text{NF}\kappa\text{Bn}] - k_{36}[\text{A20mRNA}] \\
\frac{d([\text{I}\kappa\text{B}\alpha\text{mRNA}])}{dt} &= k_{55}[\text{NF}\kappa\text{Bn}] - k_{46}[\text{I}\kappa\text{B}\alpha\text{mRNA}] \\
\frac{d([\text{IRF7}])}{dt} &= -k_5[\text{IRAK1/4:TRAF6:TRAF3}][\text{IRF7}] + k_6[\text{IRF7}]
\end{aligned}$$

$$\begin{aligned}
\frac{d(\text{JNK})}{dt} &= k_{33}[\text{JNK}^*] - k_{30}[\text{JNK}][\text{MKK4/7}] \\
\frac{d(\text{MKK4/7}^*)}{dt} &= -k_{34}[\text{MKK4/7}^*] + \frac{k_{31}[\text{Tak1:Tab2:Tab3}^*][\text{MKK4/7}]}{k_{79} + [\text{MKK4/7}]} \\
\frac{d(\text{JNK}^*)}{dt} &= -k_{33}[\text{JNK}^*] + k_{30}[\text{JNK}][\text{MKK4/7}] \\
\frac{d(\text{MKK4/7})}{dt} &= k_{34}[\text{MKK4/7}^*] - \frac{k_{31}[\text{Tak1:Tab2:Tab3}^*][\text{MKK4/7}]}{k_{79} + [\text{MKK4/7}]} \\
\frac{d(\text{IRAK1/4}^*:\text{TRAF6}:\text{TRAF3})}{dt} &= k_9[\text{IRAK1/4}^*:\text{TRAF6}]:[\text{TRAF3}] - k_{28}[\text{IRAK1/4}^*:\text{TRAF6}:\text{TRAF3}] \\
\frac{d([\text{I}\kappa\text{B}\alpha^*])}{dt} &= k_{38}[\text{I}\kappa\text{B}\alpha:\text{NF}\kappa\text{B}] + k_{54}[\text{NEMO:IKK}\beta^*:\text{IKK}\alpha:\text{NF}\kappa\text{B}:\text{I}\kappa\text{B}\alpha] + k_{40}[\text{NEMO:IKK}\beta^*:\text{IKK}\alpha:\text{I}\kappa\text{B}\alpha] - k_{140}[\text{I}\kappa\text{B}\alpha^*] \\
\frac{d([\text{NEMO:IKK}\beta^*:\text{IKK}\alpha:\text{NF}\kappa\text{B}:\text{I}\kappa\text{B}\alpha])}{dt} &= k_{15}[\text{NEMO:IKK}\beta^*:\text{IKK}\alpha][\text{I}\kappa\text{B}\alpha:\text{NF}\kappa\text{B}] - k_{54}[\text{NEMO:IKK}\beta^*:\text{IKK}\alpha:\text{NF}\kappa\text{B}:\text{I}\kappa\text{B}\alpha] \\
\frac{d([\text{NEMO:IKK}\beta^*:\text{IKK}\alpha:\text{I}\kappa\text{B}\alpha])}{dt} &= k_{39}[\text{NEMO:IKK}\beta^*:\text{IKK}\alpha][\text{I}\kappa\text{B}\alpha] - k_{40}[\text{NEMO:IKK}\beta^*:\text{IKK}\alpha:\text{I}\kappa\text{B}\alpha] \\
\frac{d([\text{inactiveIKK}])}{dt} &= k_{41}[\text{NEMO:IKK}\beta^*:\text{IKK}\alpha] - k_{51}[\text{inactiveIKK}] + k_{53}[\text{NEMO:IKK}\beta^*:\text{IKK}\alpha][\text{A20}] \\
\frac{d([\text{TLR3}])}{dt} &= -k_{56}[\text{poly(I:C)}][\text{TLR3}] \\
\frac{d([\text{TLR3}^*])}{dt} &= k_{56}[\text{poly(I:C)}][\text{TLR3}] - k_{67}[\text{TLR3}] \\
\frac{d([\text{TRIF}])}{dt} &= -k_{57}[\text{TLR3}^*][\text{TRIF}] + k_{69}[\text{TRIF}^*:\text{TRAF3}] + k_{70}[\text{TRIF}^*:\text{TRADD:FADD:RIP1:TRAF6}] \\
\frac{d([\text{TRIF}^*])}{dt} &= k_{57}[\text{TLR3}^*][\text{TRIF}] - k_{58}[\text{TRIF}^*][\text{TRAF3}] - k_{59}[\text{TRIF}^*:\text{TRAF3}] - k_{60}[\text{TRIF}^*][\text{TRIF}^*:\text{TRADD:FADD}][\text{TRAF6}] \\
\frac{d([\text{TRIF}^*:\text{TRAF3}])}{dt} &= k_{58}[\text{TRIF}^*][\text{TRAF3}] + k_{59}[\text{TRIF}^*:\text{TRAF3}] - k_{69}[\text{TRIF}^*:\text{TRAF3}] \\
\frac{d([\text{TRADD:FADD:RIP1}])}{dt} &= -k_{60}[\text{TRIF}^*][\text{TRIF}^*:\text{TRADD:FADD}][\text{TRAF6}] + k_{70}[\text{TRIF}^*:\text{TRADD:FADD:RIP1:TRAF6}] \\
\frac{d([\text{TRIF}^*:\text{TRADD:FADD:RIP1:TRAF6}])}{dt} &= k_{60}[\text{TRIF}^*][\text{TRIF}^*:\text{TRADD:FADD}][\text{TRAF6}] - k_{70}[\text{TRIF}^*:\text{TRADD:FADD:RIP1:TRAF6}] \\
\frac{d([\text{IKK}\epsilon])}{dt} &= -k_{62}[\text{IKK}\epsilon][\text{TRIF}^*:\text{TRAF3}] + k_{66}[\text{TBK1}^*:\text{IKK}\epsilon] - k_{146}[\text{IKK}\epsilon][\text{IPS3}^*:\text{TRAF3}] \\
\frac{d([\text{IKK}\epsilon^*])}{dt} &= k_{62}[\text{IKK}\epsilon][\text{TRIF}^*:\text{TRAF3}] - k_{64}[\text{TBK1}^*][\text{IKK}\epsilon] + k_{146}[\text{IKK}\epsilon][\text{IPS3}^*:\text{TRAF3}] \\
\frac{d([\text{TBK1}])}{dt} &= -k_{63}[\text{TBK1}][\text{TRIF}^*:\text{TRAF3}] + k_{66}[\text{TBK1}^*:\text{IKK}\epsilon] - k_{147}[\text{TBK1}][\text{IPS3}^*:\text{TRAF3}] \\
\frac{d([\text{TBK1}^*])}{dt} &= k_{63}[\text{TBK1}][\text{TRIF}^*:\text{TRAF3}] - k_{64}[\text{TBK1}^*][\text{IKK}\epsilon] + k_{147}[\text{TBK1}][\text{IPS3}^*:\text{TRAF3}] \\
\frac{d([\text{TBK1}^*:\text{IKK}\epsilon])}{dt} &= k_{64}[\text{TBK1}^*][\text{IKK}\epsilon] - k_{66}[\text{TBK1}^*:\text{IKK}\epsilon] \\
\frac{d([\text{IRF3}])}{dt} &= -k_{65}[\text{TBK1}^*:\text{IKK}\epsilon][\text{IRF3}] + k_{69}[\text{IRF3}^*] \\
\frac{d([\text{IL6I1}])}{dt} &= -k_{105}[\text{IL6I1}] - k_{71}[\text{IL6I1}] + k_{118} \left( 0.0001 + 0.9999 \left( 1 - \frac{1}{1 + k_{120}[\text{RELBp52}]} \right) \right) \\
&+ k_{102} \left( 1 - \frac{1}{1 + k_{98}[\text{NF}\kappa\text{B}]} + \frac{1}{1 + k_{97}[\text{NF}\kappa\text{Bn}][\text{AP1}^*][\text{FACY}]^{1.5}} + \frac{1}{1 + k_{100}[\text{AP1}]} + \frac{1}{1 + k_{96}[\text{FACX}][\text{NF}\kappa\text{Bn}][\text{AP1}^*]} \right) \\
\frac{d([\text{IL6I2}])}{dt} &= k_{71}[\text{IL6I1}] - k_{72}[\text{IL6I2}] \\
\frac{d([\text{IL6I3}])}{dt} &= k_{72}[\text{IL6I2}] - k_{73}[\text{IL6I3}] \\
\frac{d([\text{IL12I2}])}{dt} &= k_{71}[\text{IL12I1}] - k_{72}[\text{IL12I2}] \\
\frac{d([\text{IL12I3}])}{dt} &= k_{72}[\text{IL12I2}] - k_{73}[\text{IL12I3}] \\
\frac{d([\text{IL6mRNA}])}{dt} &= k_{73}[\text{IL6I3}] - k_{74}[\text{IL6mRNA}] - k_{123}[\text{IL6mRNA}][\text{STAT3}] - k_{114}[\text{TPP}][\text{IL6mRNA}] \\
\frac{d([\text{IL12mRNA}])}{dt} &= k_{73}[\text{IL12I3}] - k_{74}[\text{IL12mRNA}] - k_{122}[\text{IL12mRNA}][\text{STAT3}] - k_{114}[\text{TPP}][\text{IL12mRNA}] \\
\frac{d([\text{Tak1:Tab2:Tab3}])}{dt} &= -k_8[\text{IRAK1/4}^*:\text{TRAF6}][\text{Tak1:Tab2:Tab3}] + k_{22}[\text{Tak1:Tab2:Tab3}^*] \\
&- k_{61}[\text{TRIF}^*:\text{TRADD:FADD:RIP1:TRAF6}][\text{Tak1:Tab2:Tab3}]
\end{aligned}$$

$$\begin{aligned}
\frac{d([\text{NEMO:IKK}\beta:\text{IKK}\alpha:\text{Tak1:Tab2:Tab3}^*])}{dt} &= -k_{76}[\text{NEMO:IKK}\beta:\text{IKK}\alpha:\text{Tak1:Tab2:Tab3}^*] + k_{75}[\text{NEMO:IKK}\beta:\text{IKK}\alpha][\text{Tak1:Tab2:Tab3}^*] \\
\frac{d([\text{Tak1:Tab2:Tab3}^*])}{dt} &= k_8[\text{IRAK1/4}^*:\text{TRAF6}][\text{Tak1:Tab2:Tab3}] + k_{61}[\text{TRIF}^*:\text{TRADD:FADD:RIP1:TRAF6}][\text{Tak1:Tab2:Tab3}] \\
&+ k_{76}[\text{NEMO:IKK}\beta:\text{IKK}\alpha:\text{Tak1:Tab2:Tab3}^*] - k_{75}[\text{NEMO:IKK}\beta:\text{IKK}\alpha][\text{Tak1:Tab2:Tab3}^*] - k_{22}[\text{Tak1:Tab2:Tab3}] \\
\frac{d([\text{IL12I1}])}{dt} &= -k_{105}[\text{IL12I1}] - k_{71}[\text{IL12I1}] + k_{118} \left( 0.0001 + 0.9999 \left( 1 - \frac{1}{1 + k_{119}[\text{RELBp52}]} \right) \right) \\
&+ k_{102} \left( 1 - \frac{1}{1 + k_{98}[\text{NF}\alpha\text{B}] + k_{99}[\text{NF}\alpha\text{Bn}][\text{AP1}^*][\text{FACY}]^{1.5}} \frac{1}{1 + k_{100}[\text{AP1}^*] + k_{101}[\text{FACY}][\text{NF}\alpha\text{Bn}][\text{FACTX}]} \right) \\
\frac{d([\text{IFN1I}])}{dt} &= -k_{106}[\text{IFN1I}] - k_{110}[\text{IFN1I}] + k_{81} \left( 0.0001 + 0.9999 \left( 1 - \frac{1}{1 + k_{153}[\text{IRF5}^*]} \right) \right) + k_{115} \left( 0.0001 + 0.9999 \left( 1 - \frac{1}{1 + k_{153}[\text{IRF7}^*]} \right) \right) \\
&+ k_{80} \left( 1 - \frac{1}{1 + k_{82}[\text{IRF3}^*] + 0.0001[\text{NF}\alpha\text{Bn}][\text{AP1}^*][\text{IRF3}^*]} \right) \\
\frac{d([\text{IFN12}])}{dt} &= k_{106}[\text{IFN1I}] - k_{107}[\text{IFN12}] \\
\frac{d([\text{IFN13}])}{dt} &= k_{107}[\text{IFN12}] - k_{108}[\text{IFN13}] \\
\frac{d([\text{Type1IFN}])}{dt} &= k_{108}[\text{IFN13}] - k_{109}[\text{Type1IFN}] + k_{89} \left( 0.0001 + 0.9999 \left( 1 - \frac{1}{1 + k_{90}[\text{STAT1:STAT2n}^*]} \right) \right) \\
\frac{d([\text{TYK2:JAK1}])}{dt} &= k_{85}[\text{TYK2:JAK1}^*] - k_{83}[\text{TYK2:JAK1}][\text{Type1IFN}] \\
\frac{d([\text{TYK2:JAK1}^*])}{dt} &= -k_{85}[\text{TYK2:JAK1}^*] + k_{83}[\text{TYK2:JAK1}][\text{Type1IFN}] \\
\frac{d([\text{STAT1:STAT2}])}{dt} &= k_{86}[\text{STAT1:STAT2}^*] - k_{84}[\text{STAT1:STAT2}][\text{TYK2:JAK1}^*] \\
\frac{d([\text{STAT1:STAT2}^*])}{dt} &= -k_{86}[\text{STAT1:STAT2}^*] + k_{84}[\text{STAT1:STAT2}][\text{TYK2:JAK1}^*] - k_{87}[\text{STAT1:STAT2}^*] + k_{88}[\text{STAT1:STAT2n}^*] \\
\frac{d([\text{PI3K}])}{dt} &= -k_{91}[\text{PI3K}][\text{Type1IFN}] + k_{93}[\text{PI3K}^*] \\
\frac{d([\text{PI3K}^*])}{dt} &= k_{91}[\text{PI3K}][\text{Type1IFN}] - k_{93}[\text{PI3K}^*] \\
\frac{d([\text{AKT}])}{dt} &= -k_{92}[\text{AKT}][\text{PI3K}^*] + k_{95}[\text{AKT}^*] \\
\frac{d([\text{AKT}^*])}{dt} &= k_{92}[\text{AKT}][\text{PI3K}^*] - k_{95}[\text{AKT}^*] \\
\frac{d([\text{NIK}])}{dt} &= -k_{112}[\text{NIK}][\text{Type1IFN}] + k_{141}[\text{NIK}^*] \\
\frac{d([\text{NIK}^*])}{dt} &= k_{112}[\text{NIK}][\text{Type1IFN}] - k_{141}[\text{NIK}^*] \\
\frac{d([\text{RELBp100}])}{dt} &= -k_{112}[\text{NIK}^*][\text{RELBp100}] + k_{141}[\text{RELBp100}^*] \\
\frac{d([\text{RELBp100}^*])}{dt} &= k_{112}[\text{NIK}^*][\text{RELBp100}] - k_{141}[\text{RELBp100}^*] \\
\frac{d([\text{RELBp50}^*])}{dt} &= k_{112}[\text{RELBp50}][\text{RELBp100}^*] - k_{141}[\text{RELBp50}^*] \\
\frac{d([\text{FACZ}])}{dt} &= k_{139}[\text{STAT1:STAT2n}^*] - k_{150}[\text{FACZ}] \\
\frac{d([\text{IL10}])}{dt} &= -k_{127}[\text{IL10}] - k_{112}[\text{TPP}][\text{IL10}] + k_{130}[\text{MSK1/2}][\text{STAT1:STAT2n}^*] \\
\frac{d([\text{MSK1/2}])}{dt} &= -k_{131}[\text{MSK1/2}][\text{ERK}^*] + k_{131}[\text{MSK1/2}^*] - k_{112}[\text{MSK1/2}][\text{p38}^*] \\
\frac{d([\text{MSK1/2}^*])}{dt} &= k_{131}[\text{MSK1/2}][\text{ERK}^*] - k_{131}[\text{MSK1/2}^*] + k_{112}[\text{MSK1/2}][\text{p38}^*] \\
\frac{d([\text{STAT3}])}{dt} &= -k_{126}[\text{STAT3}][\text{IL10}] + k_{129}[\text{STAT3}^*] \\
\frac{d([\text{STAT3}^*])}{dt} &= k_{126}[\text{STAT3}][\text{IL10}] - k_{129}[\text{STAT3}^*] \\
\frac{d([\text{PREFACY}])}{dt} &= -\frac{k_{124}[\text{STAT1:STAT2n}^*][\text{PREFACY}]}{k_{125} + [\text{PREFACY}]}
\end{aligned}$$

$$\begin{aligned}
\frac{d([\text{IL1amRNA}])}{dt} &= k_{132}[\text{IL6I3}] - k_{134}[\text{IL1amRNA}] - k_{133}[\text{IL1amRNA}][\text{STAT3}] - k_{114}[\text{TPP}][\text{IL1amRNA}] \\
\frac{d([\text{CSF3mRNA}])}{dt} &= -k_{150}[\text{CSF3mRNA}] - k_{113}[\text{CSF3mRNA}][\text{TTP}] - k_{138}[\text{CSF3mRNA}][\text{STAT3}] \\
&+ k_{102} \left( 1 - \frac{1}{1 + k_{98}[\text{NF}\kappa\text{B}]} - \frac{1}{1 + k_{135}[\text{NF}\kappa\text{Bn}][\text{AP1}^*][\text{FACY}]^{1.5}} - \frac{1}{1 + k_{136}[\text{AP1}^*]} - \frac{1}{1 + k_{137}[\text{FACTX}]} \right) \\
\frac{d([\text{MDA5}])}{dt} &= -k_{142}[\text{MDA5}][\text{poly(I:C)}] \\
\frac{d([\text{MDA5}^*])}{dt} &= k_{142}[\text{MDA5}][\text{poly(I:C)}] - k_{142}[\text{MDA5}^*] \\
\frac{d([\text{IPS1}])}{dt} &= -k_{143}[\text{IPS1}][\text{MDA5}^*] + k_{149}[\text{IPS1}^*] - k_{117}[\text{IPS1}][\text{RIG-I}^*] \\
\frac{d([\text{IPS1}^*])}{dt} &= k_{143}[\text{IPS1}][\text{MDA5}^*] - k_{149}[\text{IPS1}^*] + k_{117}[\text{IPS1}][\text{RIG-I}^*] - k_{144}[\text{IPS1}^*][\text{TRAF3}] + k_{145}[\text{IPS1}^*:\text{TRAF3}] \\
\frac{d([\text{IPS1}^*:\text{TRAF3}])}{dt} &= k_{144}[\text{IPS1}^*][\text{TRAF3}] - k_{145}[\text{IPS1}^*:\text{TRAF3}] \\
\frac{d([\text{RIG-I}])}{dt} &= -k_{152}[\text{RIG-I}][\text{poly(I:C)}] \\
\frac{d([\text{RIG-I}^*])}{dt} &= k_{152}[\text{RIG-I}][\text{poly(I:C)}] - k_{116}[\text{RIG-I}^*] \\
\frac{d([\text{MK2}])}{dt} &= -k_{154}[\text{MK2}][\text{p38}^*] \\
\frac{d([\text{TTP}])}{dt} &= k_{155}[\text{MK2}^*] - k_{157}[\text{TTP}] \\
\frac{d([\text{MK2}^*])}{dt} &= k_{154}[\text{MK2}^*][\text{p38}^*] \\
\frac{d([\text{IRF5}])}{dt} &= -k_{151}[\text{IRAK1/4}^*:\text{TRAF6}:\text{TRAF3}][\text{IRF5}] \\
\frac{d([\text{IRF5}^*])}{dt} &= k_{151}[\text{IRAK1/4}^*:\text{TRAF6}:\text{TRAF3}][\text{IRF5}] \\
\frac{d([\text{I}\kappa\text{B}\alpha\text{n}])}{dt} &= -k_{42}[\text{NF}\kappa\text{Bn}][\text{I}\kappa\text{B}\alpha\text{n}] + k_{44}[\text{I}\kappa\text{B}\alpha] - k_{45}[\text{I}\kappa\text{B}\alpha\text{n}] \\
\frac{d([\text{I}\kappa\text{B}\alpha\text{n}:\text{NF}\kappa\text{Bn}])}{dt} &= k_{42}[\text{NF}\kappa\text{Bn}][\text{I}\kappa\text{B}\alpha\text{n}] - k_{43}[\text{I}\kappa\text{B}\alpha\text{n}:\text{NF}\kappa\text{Bn}] \\
\frac{d([\text{NF}\kappa\text{Bn}])}{dt} &= k_{16}[\text{NF}\kappa\text{B}] - k_{42}[\text{NF}\kappa\text{Bn}][\text{I}\kappa\text{B}\alpha\text{n}] \\
\frac{d([\text{AP1}^*])}{dt} &= k_{20}[\text{ERK}^*][\text{AP1}] + k_{32}[\text{JNK}^*][\text{AP1}] + k_{14}[\text{p38}^*][\text{AP1}] + k_{29}[\text{AP1}^*] \\
\frac{d([\text{STAT1}:\text{STAT2n}^*])}{dt} &= k_{87}[\text{STAT1}:\text{STAT2}^*] - k_{88}[\text{STAT1}:\text{STAT2n}^*] - k_{128}[\text{STAT1}:\text{STAT2n}^*] \\
\frac{d([\text{FACX}])}{dt} &= k_{103}[\text{IRF3}^*] - k_{104}[\text{FACX}] \\
\frac{d([\text{FACY}])}{dt} &= \frac{k_{124}[\text{STAT1}:\text{STAT2n}^*][\text{PREFACY}]}{k_{125} + [\text{PREFACY}]} \\
\frac{d([\text{IRF3}^*])}{dt} &= k_{65}[\text{IRF3}][\text{TBK1}^*:\text{IKK}\epsilon] - k_{68}[\text{IRF3}^*] \\
\frac{d([\text{IRF7}^*])}{dt} &= k_5[\text{IRF7}][\text{IRAK1/4}^*:\text{TRAF6}:\text{TRAF3}] - k_6[\text{IRF7}^*]
\end{aligned}$$

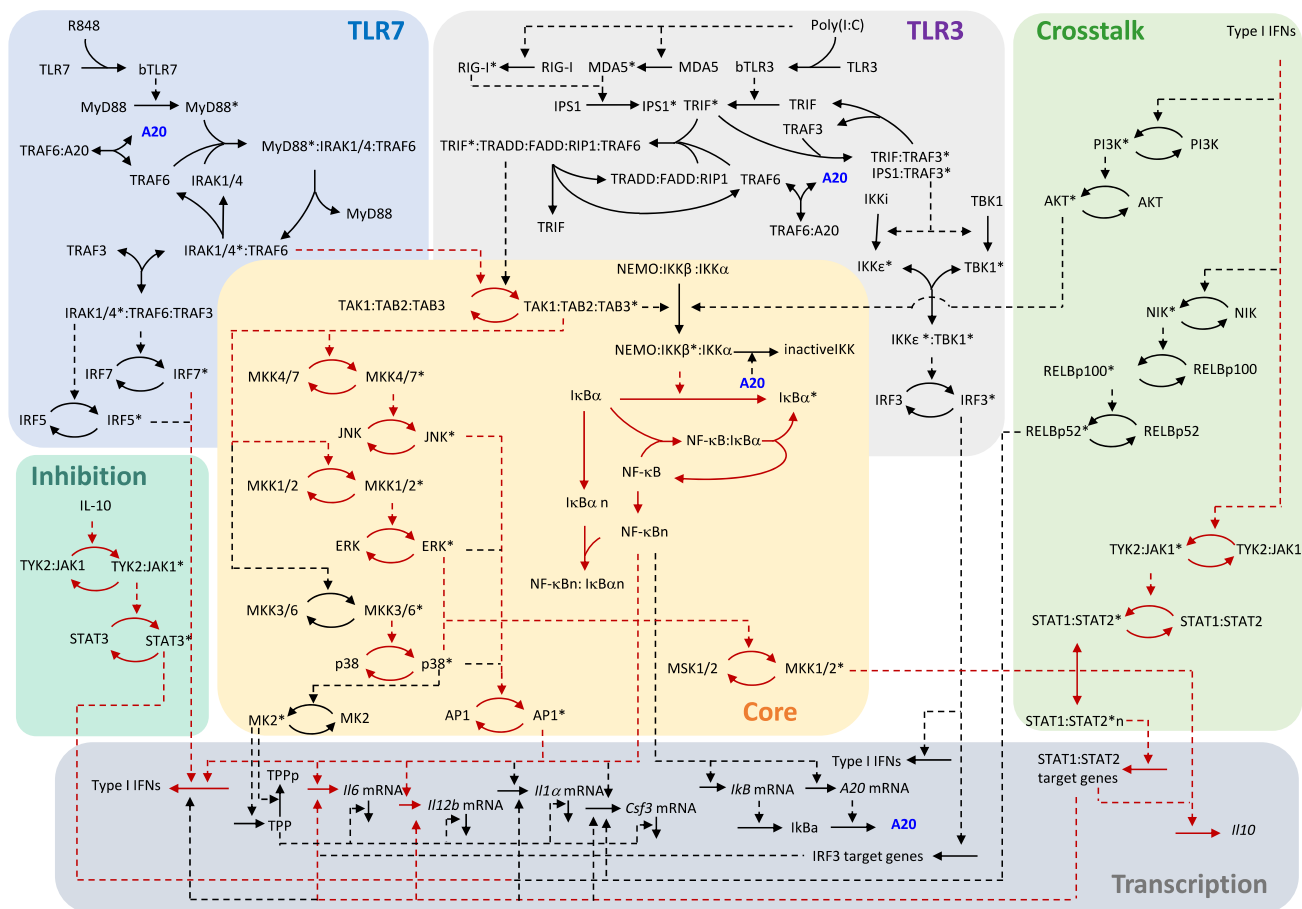

**Fig. S1. The reaction schemas for the TLR3 and TLR7 signaling networks.** These schemas are organized by different modules, designated as follows: TLR7-dependent, TLR3-dependent, and core interactions; inhibitory and transcriptional events; and TLR3-TLR7 crosstalk. Complexes are denoted by the names of their components, which are separated by a colon'. Single-headed solid arrows designate irreversible reactions, whereas double-headed arrows denote reversible reactions. Dotted arrows represent enzymatic reactions. The corresponding ODE model is presented. Those reactions with high global sensitivities, as identified by sensitivity analysis, are labeled in red.

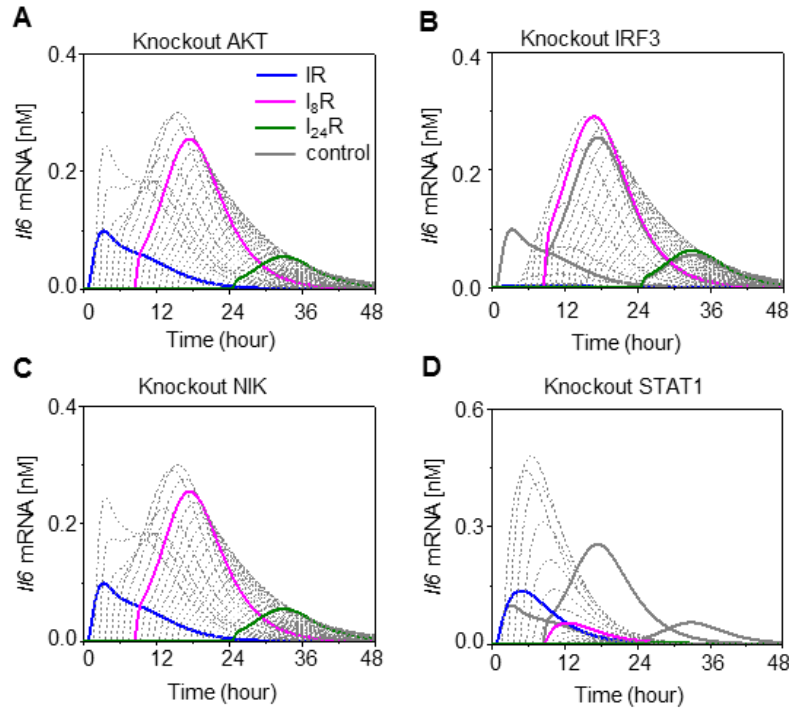

**Fig. S2. Knockout simulation results.** (A to D) Simulation profiles of changes in the abundance of *I/6* mRNA in the absence of (A) AKT, (B) IRF3, (C) NIK, and (D) STAT1.



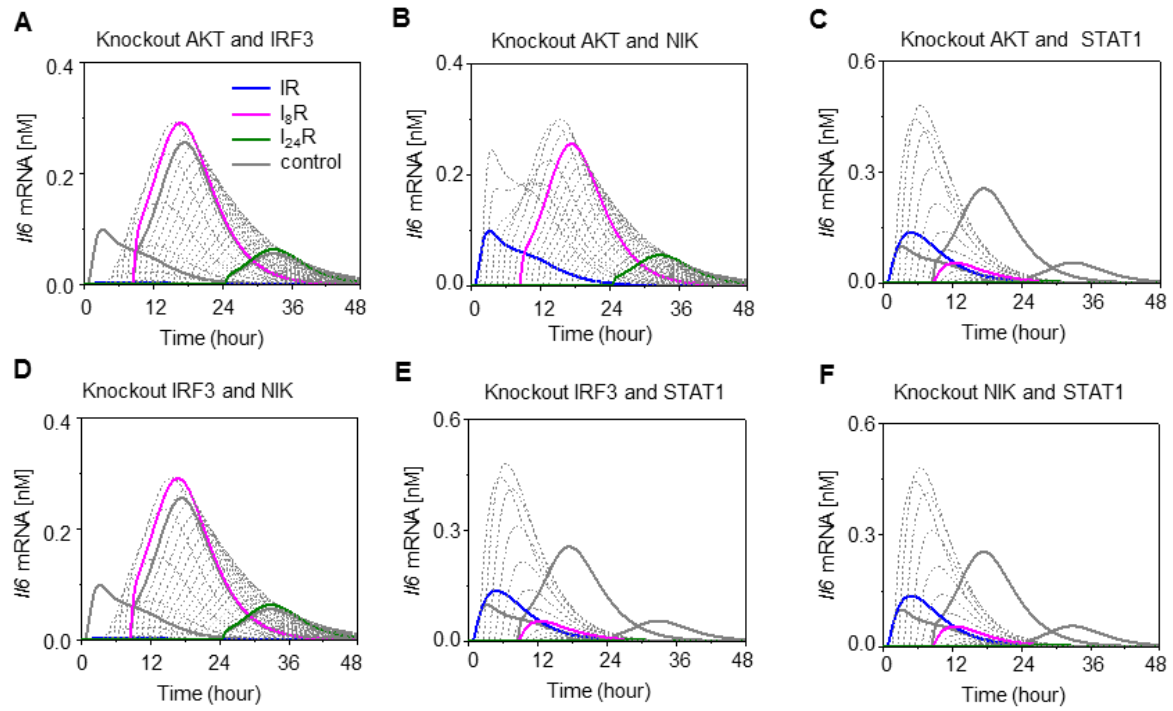

**Fig. S3. Combinatorial knockout simulation results.** (A to F) Simulation profiles of changes in the abundance of *I/6* mRNA in the absence of (A) AKT and IRF3, (B) AKT and NIK, (C) AKT and STAT1, (D) IRF3 and NIK, (E) IRF3 and STAT1, and (F) NIK and STAT1.

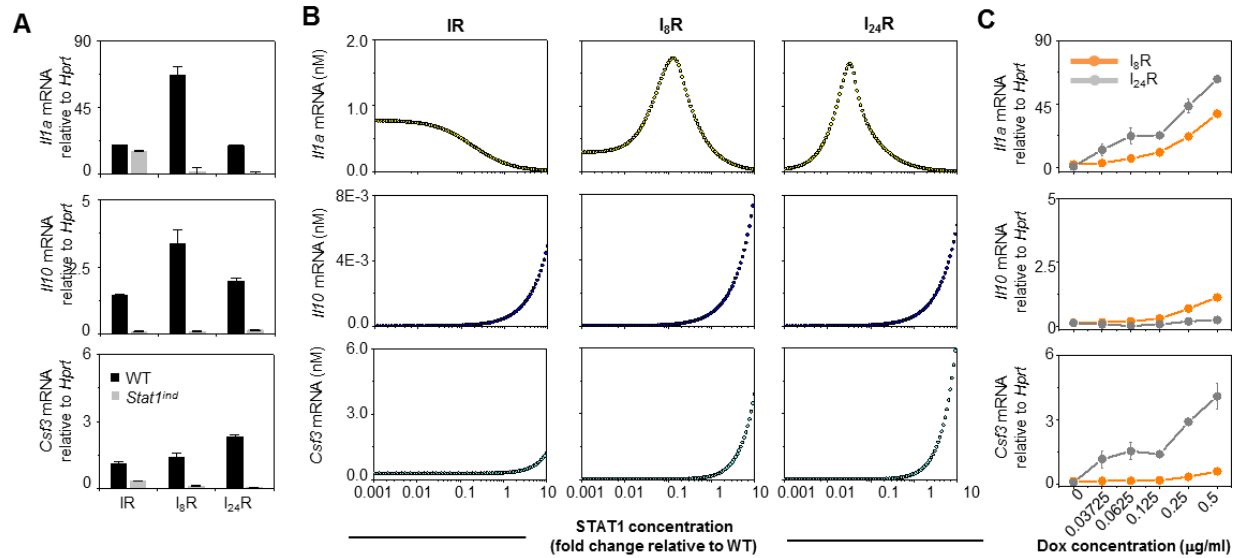

**Fig. S4. Analysis of the abundances of *Il1a*, *Il10*, and *Csf3* mRNAs in response to in silico and empirical perturbation of the JAK-STAT pathway.** (A) BMDMs isolated from wild-type (WT) and *Stat1<sup>ind</sup>* mice (*Stat1* is knocked out in *Stat1<sup>ind</sup>* mice in the absence of doxycycline) were subjected to the IR, I<sub>8</sub>R, or I<sub>24</sub>R conditions. Eight hours after treatment with R848, the abundances of the indicated cytokine mRNAs were then determined by qRT-PCR analysis. Data are means  $\pm$  SEM of three independent experiments. (B) Simulated response curves comparing the initial concentration of STAT1 with cytokine mRNA production under the IR, I<sub>8</sub>R, and I<sub>24</sub>R conditions. (C) BMDMs from *Stat1<sup>ind</sup>* mice were left untreated or were treated doxycycline (dox, 0.03125, 0.0625, 0.125, 0.25, or 0.5  $\mu$ g/ml) for 24 hours before being subjected to either the I<sub>8</sub>R or I<sub>24</sub>R conditions. Eight hours after treatment with R848, the abundances of the indicated cytokine mRNAs were then determined by qRT-PCR analysis. Data are means  $\pm$  SEM of three independent experiments.

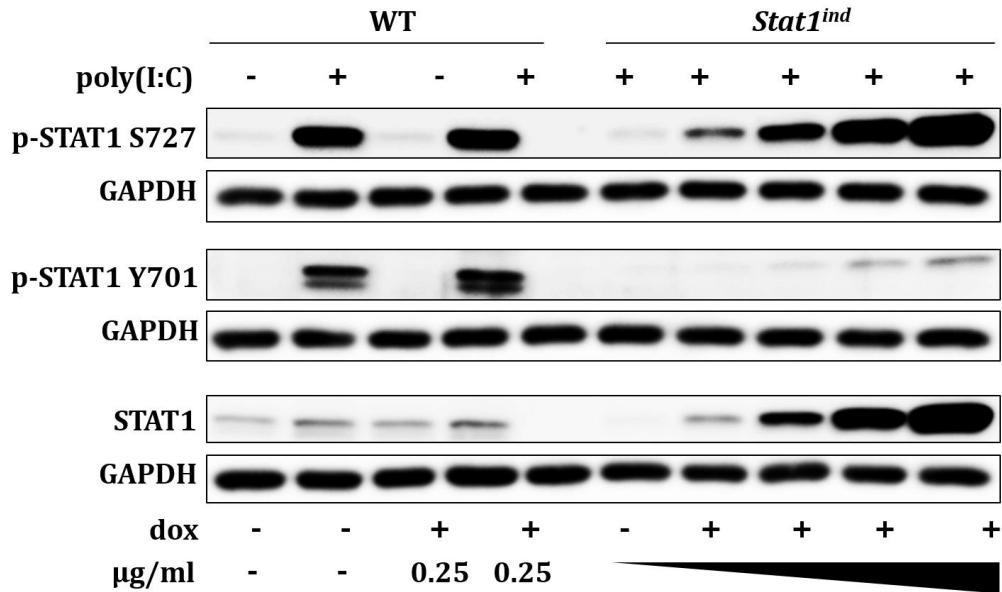

**Fig. S5. Incremental induction of *Stat1* expression in BMDMs derived from *Stat1<sup>ind</sup>* mice.** BMDMs from WT mice were left untreated (-) or were pretreated with doxycycline (dox, 0.25 μg/ml) for 24 hours, whereas BMDMs from *Stat1<sup>ind</sup>* mice were left untreated (-) or were pretreated with doxycycline (dox, 0.03125, 0.0625, 0.125, 0.25, or 0.5 μg/ml) for 24 hours. The BMDMs were then left untreated or were treated for 4 hours with poly(I:C) (10 μg/ml) as indicated. The cells were then subjected to Western blotting analysis with antibodies specific for the indicated proteins. Data are from a single experiment and are representative of three independent experiments.

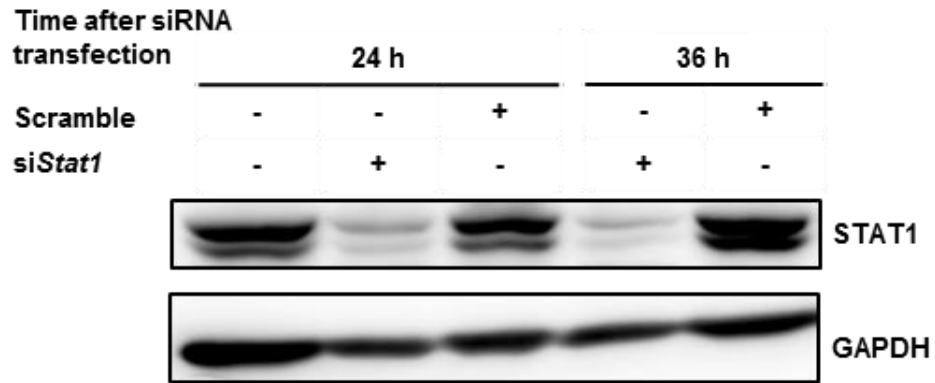

**Fig. S6. Analysis of the efficiency of knockdown of *Stat1*.** J774 were left untreated or were transfected with either *Stat1*-specific siRNA (siStat1) or control, scrambled siRNA. Twenty-four or 36 hours later, the cells were subjected to Western blotting analysis with antibodies specific for the indicated proteins. Data are from a single experiment and are representative of two independent experiments.

**Table S1. List of species and their initial concentrations.**

| <b>Name</b>          | <b>Initial State (nM)</b> | <b>Description</b>                                                                                                                              |
|----------------------|---------------------------|-------------------------------------------------------------------------------------------------------------------------------------------------|
| TLR7                 | 5.31E-01 ± 2.66E-02       | Toll-like receptor 7                                                                                                                            |
| TLR7*                | 0                         | Activate Toll-like receptor 7                                                                                                                   |
| R848                 | 0                         | Resiquimod                                                                                                                                      |
| MyD88*               | 0                         | Activate myeloid differentiation primary response 88                                                                                            |
| MyD88                | 8.74E-01 ± 4.37E-02       | Myeloid differentiation primary response 88                                                                                                     |
| IRAK1/4              | 1.29E-01 ± 6.44E-03       | Interleukin-1 receptor-associated kinase 1/4                                                                                                    |
| TRAF6                | 1.00E+00 ± 5.00E-02       | TNF receptor-associated factor 6                                                                                                                |
| MyD88*:IRAK1/4:TRAF6 | 0                         | A complex of active myeloid differentiation primary response 88, interleukin-1 receptor associated kinase 1/4, TNF receptor-associated factor 6 |
| A20                  | 4.80E-03 ± 2.40E-04       | Zinc finger protein A20                                                                                                                         |
| TRAF6:A20            | 0                         | A complex of TNF receptor-associated factor 6 and Zinc finger protein A20                                                                       |
| IRAK1/4*:TRAF6       | 0                         | A complex of active interleukin-1 receptor associated kinase 1/4 and TNF receptor-associated factor 6                                           |
| TRAF3                | 2.00E-01 ± 1.00E-02       | TNF receptor-associated factor 3                                                                                                                |
| MKK1/2               | 9.93E-01 ± 4.97E-02       | Mitogen-activated protein kinase 1/2                                                                                                            |
| MKK3/6               | 1.77E-04 ± 8.86E-06       | Mitogen-activated protein kinase 3/6                                                                                                            |
| ERK                  | 7.55E-02 ± 3.78E-03       | Extracellular signal-regulated kinase                                                                                                           |

|                 |                     |                                                                                                                                                                           |
|-----------------|---------------------|---------------------------------------------------------------------------------------------------------------------------------------------------------------------------|
| ERK*            | 0                   | Active extracellular signal-regulated kinase                                                                                                                              |
| MKK1/2*         | 0                   | Active mitogen-activated protein kinase 1/2                                                                                                                               |
| MKK3/6*         | 0                   | Active mitogen-activated protein kinase 3/6                                                                                                                               |
| p38*            | 0                   | Active p38 mitogen-activated protein kinase                                                                                                                               |
| p38             | 4.58E-01 ± 2.29E-02 | p38 mitogen-activated protein kinase                                                                                                                                      |
| AP1             | 2.00E-01 ± 1.00E-02 | AP-1 transcription factor                                                                                                                                                 |
| NEMO:IKKβ:IKKα  | 2.00E-01 ± 1.00E-02 | A complex of NF-κB essential modulator, inhibitor of nuclear factor kappa-B kinase subunit beta, and inhibitor of nuclear factor kappa-B kinase subunit alpha             |
| NEMO:IKKβ*:IKKα | 0                   | A complex of NF-kappa-B essential modulator, active inhibitor of nuclear factor kappa-B kinase subunit beta, and inhibitor of nuclear factor kappa-B kinase subunit alpha |
| IκBα            | 2.50E-03 ± 1.25E-04 | Nuclear factor of kappa light polypeptide gene enhancer in B-cells inhibitor, alpha                                                                                       |
| IκBα:NFκB       | 5.92E-02 ± 2.96E-03 | A complex of NF-κB and IκBα                                                                                                                                               |
| NFκB            | 3.00E-03 ± 1.50E-04 | Nuclear factor kappa-light-chain-enhancer of activated B cells                                                                                                            |
| A20mRNA         | 0                   | Zinc finger protein A20 mRNA                                                                                                                                              |
| IκBα mRNA       | 0                   | Nuclear factor of kappa light polypeptide gene enhancer in B-cells inhibitor, alpha mRNA                                                                                  |
| IRF7            | 2.00E-01 ± 1.00E-02 | Interferon regulatory factor 7                                                                                                                                            |

|                           |                     |                                                                                                                                                                                                                                                                                                                                |
|---------------------------|---------------------|--------------------------------------------------------------------------------------------------------------------------------------------------------------------------------------------------------------------------------------------------------------------------------------------------------------------------------|
| JNK                       | 3.20E-01 ± 1.60E-02 | c-Jun N-terminal kinases                                                                                                                                                                                                                                                                                                       |
| MKK4/7*                   | 0                   | Active mitogen-activated protein kinase 4/7                                                                                                                                                                                                                                                                                    |
| JNK*                      | 0                   | Active c-Jun N-terminal kinases                                                                                                                                                                                                                                                                                                |
| MKK4/7                    | 6.41E-03 ± 3.21E-04 | Mitogen-activated protein kinase 4/7                                                                                                                                                                                                                                                                                           |
| IRAK1/4*:TRAF6:TRAF3      | 0                   | A complex of active interleukin-1 receptor-associated kinase 1/4, TNF receptor-associated factor 6, and TNF receptor-associated factor 3                                                                                                                                                                                       |
| IκBα*                     | 0                   | Active nuclear factor of kappa light polypeptide gene enhancer in B-cells inhibitor, alpha                                                                                                                                                                                                                                     |
| NEMO:IKKβ*:IKKα:NFκB:IκBα | 0                   | A complex of NF-kappa-B essential modulator, active inhibitor of nuclear factor kappa-B kinase subunit beta, inhibitor of nuclear factor kappa-B kinase subunit alpha, nuclear factor kappa-light-chain-enhancer of activated B cells, and nuclear factor of kappa light polypeptide gene enhancer in B-cells inhibitor, alpha |
| NEMO:IKKβ*:IKKα:IκBα      | 0                   | A complex of NF-kappa-B essential modulator, active inhibitor of nuclear factor kappa-B kinase subunit beta, inhibitor of nuclear factor kappa-B kinase subunit alpha, and nuclear factor of kappa light polypeptide gene enhancer in B-cells inhibitor, alpha                                                                 |
| inactiveIKK               | 0                   | inactive inhibitor of nuclear factor kappa-B kinase                                                                                                                                                                                                                                                                            |
| Poly(I:C)                 | 0                   | Polyinosinic:polycytidylic acid                                                                                                                                                                                                                                                                                                |
| TLR3                      | 2.18E-01 ± 1.09E-02 | Toll-like receptor 3                                                                                                                                                                                                                                                                                                           |
| TLR3*                     | 0                   | Activate Toll-like receptor 3                                                                                                                                                                                                                                                                                                  |
| TRIF                      | 2.00E-01 ± 1.00E-02 | TIR-domain-containing adapter-inducing interferon-beta                                                                                                                                                                                                                                                                         |

|                             |                     |                                                                                                                                                                                                                                                                      |
|-----------------------------|---------------------|----------------------------------------------------------------------------------------------------------------------------------------------------------------------------------------------------------------------------------------------------------------------|
| TRIF*                       | 0                   | Active TIR-domain-containing adapter-inducing interferon-beta                                                                                                                                                                                                        |
| TRIF*:TRAF3                 | 0                   | A complex of active TIR-domain-containing adapter-inducing interferon-beta and TNF receptor-associated factor 3                                                                                                                                                      |
| TRADD:FADD:RIP1             | 2.00E-01 ± 1.00E-02 | A complex of TNFRSF1A-associated via death domain protein, Fas-Associated protein with death domain protein, and Receptor-interacting serine/threonine-protein kinase 1                                                                                              |
| TRIF*:TRADD:FADD:RIP1:TRAF6 | 0                   | A complex of active TIR-domain-containing adapter-inducing interferon-beta, TNFRSF1A-associated via death domain protein, Fas-Associated protein with death domain protein, Receptor-interacting serine/threonine-protein kinase 1, TNF receptor-associated factor 6 |
| IKKε                        | 2.00E-01 ± 1.00E-02 | Inhibitor of nuclear factor kappa-B kinase subunit epsilon                                                                                                                                                                                                           |
| IKKε*                       | 0                   | Active inhibitor of nuclear factor kappa-B kinase subunit epsilon                                                                                                                                                                                                    |
| TBK1                        | 1.76E-01 ± 8.82E-03 | TANK-binding kinase 1                                                                                                                                                                                                                                                |
| TBK1*                       | 0                   | Active TANK-binding kinase 1                                                                                                                                                                                                                                         |
| TBK1*:IKKε                  | 0                   | A complex of active TANK-binding kinase 1 and inhibitor of nuclear factor kappa-B kinase subunit epsilon                                                                                                                                                             |
| IRF3                        | 1.85E-01 ± 9.24E-03 | Interferon regulatory factor 3                                                                                                                                                                                                                                       |
| IL6I1                       | 0                   | Interleukin 6 production intermediate variable 1                                                                                                                                                                                                                     |
| IL6I2                       | 0                   | Interleukin 6 production intermediate variable 2                                                                                                                                                                                                                     |
| IL6I3                       | 0                   | Interleukin 6 production intermediate variable 3                                                                                                                                                                                                                     |
| IL12I2                      | 0                   | Interleukin 12 production intermediate variable 2                                                                                                                                                                                                                    |



|                                |                     |                                                                                                                                                                                                                                                                                   |
|--------------------------------|---------------------|-----------------------------------------------------------------------------------------------------------------------------------------------------------------------------------------------------------------------------------------------------------------------------------|
| IL12I3                         | 0                   | Interleukin 12 production intermediate variable 3                                                                                                                                                                                                                                 |
| IL6mRNA                        | 0                   | Interleukin 6 mRNA                                                                                                                                                                                                                                                                |
| IL12mRNA                       | 0                   | Interleukin 12 mRNA                                                                                                                                                                                                                                                               |
| Tak1:Tab2:Tab3                 | 1.00E+00 ± 5.00E-02 | A complex of Transforming growth factor beta activated kinase-1, Tak1 binding protein 2, and Tak1 binding protein 3                                                                                                                                                               |
| NEMO:IKKb:IKKa:Tak1:Tab2:Tab3* | 0                   | A complex of NF-kappa-B essential modulator, inhibitor of nuclear factor kappa-B kinase subunit beta, inhibitor of nuclear factor kappa-B kinase subunit alpha, and active transforming growth factor beta activated kinase-1, Tak1 binding protein 2, and Tak1 binding protein 3 |
| Tak1:Tab2:Tab3*                | 0                   | Active transforming growth factor beta activated kinase-1, Tak1 binding protein 2, and Tak1 binding protein 3 complex                                                                                                                                                             |
| IL12I1                         | 0                   | Interleukin 12 production intermediate variable                                                                                                                                                                                                                                   |
| IFN1                           | 0                   | Type 1 interferon production intermediate variable 1                                                                                                                                                                                                                              |
| IFN2                           | 0                   | Type 1 interferon production intermediate variable 2                                                                                                                                                                                                                              |
| IFN3                           | 0                   | Type 1 interferon production intermediate variable 3                                                                                                                                                                                                                              |
| Type1IFN                       | 0                   | Type 1 interferon                                                                                                                                                                                                                                                                 |
| TYK2:JAK1                      | 2.60E-01 ± 1.30E-02 | A complex of Tyrosine kinase 2 and Janus kinase 1                                                                                                                                                                                                                                 |
| TYK2:JAK1*                     | 0                   | Active Tyrosine kinase 2 and Janus kinase 1 complex                                                                                                                                                                                                                               |
| STAT1:STAT2                    | 1.00E+00 ± 5.00E-02 | A complex of Signal transducer and activator of transcription 1 and 2                                                                                                                                                                                                             |

|              |                     |                                                                           |
|--------------|---------------------|---------------------------------------------------------------------------|
| STAT1:STAT2* | 0                   | Active signal transducer and activator of transcription 1 and 2 complex   |
| PI3K         | 6.15E-01 ± 3.08E-02 | Phosphoinositide 3-kinase                                                 |
| PI3K*        | 0                   | Active phosphoinositide 3-kinase                                          |
| AKT          | 2.45E-01 ± 1.22E-02 | Protein kinase B                                                          |
| AKT*         | 0                   | Active protein kinase B                                                   |
| NIK          | 1.00E-02 ± 5.00E-04 | NF- $\kappa$ B-inducing kinase                                            |
| NIK*         | 0                   | Active NF- $\kappa$ B-inducing kinase                                     |
| RELBp52      | 1.00E-02 ± 5.00E-04 | NF- $\kappa$ B Rel-like domain-containing protein/p52 heterodimer         |
| RELBp100     | 1.00E-02 ± 5.00E-04 | NF- $\kappa$ B Rel-like domain-containing protein/p100 heterodimer        |
| RELBp100*    | 0                   | Active NF- $\kappa$ B Rel-like domain-containing protein/p100 heterodimer |
| RELBp52*     | 0                   | Active NF- $\kappa$ B Rel-like domain-containing protein/p52 heterodimer  |
| FACZ         | 0                   | STAT1:STAT2 target factors that regulates <i>Csf3</i> production          |
| IL10         | 0                   | Interleukin 10                                                            |
| MSK1/2       | 1.00E+00 ± 5.00E-02 | Mitogen- and stress-activated protein kinase 1/2                          |
| MSK1/2*      | 0                   | Active mitogen- and stress-activated protein kinase 1/2                   |
| STAT3        | 1.00E+01 ± 5.00E-01 | Signal transducer and activator of transcription 3                        |
| STAT3*       | 0                   | Active signal transducer and activator of transcription 3                 |
| IL1amRNA     | 0                   | Interleukin 1 $\alpha$ mRNA                                               |
| CSF3mRNA     | 0                   | Colony Stimulating Factor 3 mRNA                                          |

|               |                     |                                                                                                                                                                                |
|---------------|---------------------|--------------------------------------------------------------------------------------------------------------------------------------------------------------------------------|
| MDA5          | 4.10E-01 ± 2.05E-02 | Melanoma Differentiation-Associated protein 5                                                                                                                                  |
| MDA5*         | 0                   | Active melanoma Differentiation-Associated protein 5                                                                                                                           |
| IPS1          | 4.10E-02 ± 2.05E-03 | Induced by phosphate starvation1                                                                                                                                               |
| IPS1*         | 0                   | Active Induced by phosphate starvation1                                                                                                                                        |
| IPS1*:TRAF3   | 0                   | A complex of active Induced by phosphate starvation1 and TNF receptor-associated factor 3                                                                                      |
| RIG-I         | 1.31E-01 ± 6.55E-03 | Retinoic acid-inducible gene 1                                                                                                                                                 |
| RIG-I*        | 0                   | Active retinoic acid-inducible gene 1)                                                                                                                                         |
| MK2           | 4.00E-01 ± 2.00E-02 | Mitogen-Activated Protein Kinase-Activated Protein Kinase 2                                                                                                                    |
| TTP           | 1.00E-01 ± 5.00E-03 | Tristetraprolin                                                                                                                                                                |
| TTPp          | 0                   | Phosphorated tristetraprolin                                                                                                                                                   |
| MK2*          | 0                   | Active mitogen-Activated Protein Kinase-Activated Protein Kinase 2                                                                                                             |
| IRF5          | 6.00E-02 ± 3.00E-03 | Interferon regulatory factor 5                                                                                                                                                 |
| IRF5*         | 0                   | Active interferon regulatory factor 5                                                                                                                                          |
| IκBαn         | 3.40E-03 ± 1.70E-04 | Nuclear factor of kappa light polypeptide gene enhancer in B-cells inhibitor, alpha in nucleus                                                                                 |
| IκBαn:NFκBn   | 1.00E-04 ± 5.00E-06 | A complex of nuclear factor of kappa light polypeptide gene enhancer in B-cells inhibitor, alpha and nuclear factor kappa-light-chain-enhancer of activated B cells in nucleus |
| NFκBn         | 2.30E-03 ± 1.15E-04 | Nuclear factor kappa-light-chain-enhancer of activated B cells in nucleus                                                                                                      |
| AP1*          | 0                   | Active AP-1 transcription factor                                                                                                                                               |
| STAT1:STAT2n* | 0                   | Nuclear complex of Signal transducer and activator of transcription 1 and 2                                                                                                    |

|       |   |                                        |
|-------|---|----------------------------------------|
| FACX  | 0 | IRF3 target factors                    |
| FACY  | 0 | STAT1:STAT2 target factors (e.g. IRF1) |
| IRF3* | 0 | Active interferon regulatory factor 3  |
| IRF7* | 0 | Active interferon regulatory factor 7  |

**Table. S2. List of parameters and their values.**

| <b>Parameter</b> | <b>Value</b> | <b>Unit</b>                        |
|------------------|--------------|------------------------------------|
| k1               | 4.31303      | nM <sup>-1</sup> min <sup>-1</sup> |
| k2               | 62.0718      | min <sup>-1</sup>                  |
| k3               | 79.7282      | nM <sup>-1</sup> min <sup>-1</sup> |
| k4               | 18.3319      | nM <sup>-2</sup> min <sup>-1</sup> |
| k5               | 0.401153     | nM <sup>-1</sup> min <sup>-1</sup> |
| k6               | 0.555267     | min <sup>-1</sup>                  |
| k7               | 0.455019     | min <sup>-1</sup>                  |
| k8               | 10.2145      | nM <sup>-1</sup> min <sup>-1</sup> |
| k9               | 0.114814     | nM <sup>-1</sup> min <sup>-1</sup> |
| k10              | 49.5518      | min <sup>-1</sup>                  |
| k11              | 93.6679      | min <sup>-1</sup>                  |
| k12              | 11.5939      | nM <sup>-1</sup> min <sup>-1</sup> |
| k13              | 83.0183      | nM <sup>-1</sup> min <sup>-1</sup> |
| k14              | 0.001        | nM <sup>-1</sup> min <sup>-1</sup> |
| k15              | 60           | nM <sup>-1</sup> min <sup>-1</sup> |
| k16              | 0.15         | min <sup>-1</sup>                  |
| k17              | 30           | nM <sup>-1</sup> min <sup>-1</sup> |
| k18              | 0.0659759    | min <sup>-1</sup>                  |
| k19              | 0.497574     | min <sup>-1</sup>                  |
| k20              | 0.001        | nM <sup>-1</sup> min <sup>-1</sup> |
| k21              | 0.0015       | nMmin <sup>-1</sup>                |
| k22              | 0.479795     | min <sup>-1</sup>                  |
| k23              | 0.337396     | min <sup>-1</sup>                  |
| k24              | 0.0929546    | min <sup>-1</sup>                  |
| k25              | 0.0325152    | min <sup>-1</sup>                  |
| k26              | 0.284599     | nM <sup>-1</sup> min <sup>-1</sup> |
| k27              | 1.90E-08     | min <sup>-1</sup>                  |
| k28              | 0.446332     | min <sup>-1</sup>                  |
| k29              | 0.05         | min <sup>-1</sup>                  |
| k30              | 53.2169      | nM <sup>-1</sup> min <sup>-1</sup> |
| k31              | 64.0901      | min <sup>-1</sup>                  |
| k32              | 0.85         | nM <sup>-1</sup> min <sup>-1</sup> |
| k33              | 0.128266     | min <sup>-1</sup>                  |
| k34              | 0.127762     | min <sup>-1</sup>                  |
| k35              | 30           | min <sup>-1</sup>                  |
| k36              | 0.024        | min <sup>-1</sup>                  |
| k37              | 0.018        | min <sup>-1</sup>                  |
| k38              | 0.0012       | min <sup>-1</sup>                  |

|     |            |                                    |
|-----|------------|------------------------------------|
| k39 | 12         | nM <sup>-1</sup> min <sup>-1</sup> |
| k40 | 6          | min <sup>-1</sup>                  |
| k41 | 0.09       | min <sup>-1</sup>                  |
| k42 | 30         | nM <sup>-1</sup> min <sup>-1</sup> |
| k43 | 0.6        | min <sup>-1</sup>                  |
| k44 | 0.085      | min <sup>-1</sup>                  |
| k45 | 0.04       | min <sup>-1</sup>                  |
| k46 | 0.024      | min <sup>-1</sup>                  |
| k47 | 30         | min <sup>-1</sup>                  |
| k48 | 0.006      | min <sup>-1</sup>                  |
| k49 | 0.0075     | min <sup>-1</sup>                  |
| k50 | 0.0075     | min <sup>-1</sup>                  |
| k51 | 0.0075     | min <sup>-1</sup>                  |
| k52 | 3.00E-05   | min <sup>-1</sup>                  |
| k53 | 6          | nM <sup>-1</sup> min <sup>-1</sup> |
| k54 | 6          | min <sup>-1</sup>                  |
| k55 | 3.00E-05   | min <sup>-1</sup>                  |
| k56 | 9952       | nM <sup>-1</sup> min <sup>-1</sup> |
| k57 | 0.666364   | nM <sup>-1</sup> min <sup>-1</sup> |
| k58 | 0.938185   | nM <sup>-1</sup> min <sup>-1</sup> |
| k59 | 0.0196567  | min <sup>-1</sup>                  |
| k60 | 1          | nM <sup>-2</sup> min <sup>-1</sup> |
| k61 | 0.00616326 | nM <sup>-1</sup> min <sup>-1</sup> |
| k62 | 0.88438    | nM <sup>-1</sup> min <sup>-1</sup> |
| k63 | 1          | nM <sup>-1</sup> min <sup>-1</sup> |
| k64 | 0.9936     | nM <sup>-1</sup> min <sup>-1</sup> |
| k65 | 0.818255   | nM <sup>-1</sup> min <sup>-1</sup> |
| k66 | 0.240184   | min <sup>-1</sup>                  |
| k67 | 0.0409038  | min <sup>-1</sup>                  |
| k68 | 0.018947   | min <sup>-1</sup>                  |
| k69 | 0.012172   | min <sup>-1</sup>                  |
| k70 | 1          | min <sup>-1</sup>                  |
| k71 | 0.055068   | min <sup>-1</sup>                  |
| k72 | 0.00453392 | min <sup>-1</sup>                  |
| k73 | 0.00450439 | min <sup>-1</sup>                  |
| k74 | 0.347466   | min <sup>-1</sup>                  |
| k75 | 4.17803    | nM <sup>-1</sup> min <sup>-1</sup> |
| k76 | 0.0110971  | min <sup>-1</sup>                  |
| k77 | 7712.52    | nM                                 |
| k78 | 2.35374    | nM                                 |

|      |             |                                    |
|------|-------------|------------------------------------|
| k79  | 19991.5     | nM                                 |
| k80  | 0.111635    | dimensionless                      |
| k81  | 20          | dimensionless                      |
| k82  | 0.499547    | nM <sup>-1</sup>                   |
| k83  | 0.00181387  | nM <sup>-1</sup> min <sup>-1</sup> |
| k84  | 0.372414    | nM <sup>-1</sup> min <sup>-1</sup> |
| k85  | 0.0407122   | min <sup>-1</sup>                  |
| k86  | 0.0169071   | min <sup>-1</sup>                  |
| k87  | 0.0387076   | min <sup>-1</sup>                  |
| k88  | 0.0131879   | min <sup>-1</sup>                  |
| k89  | 3.68E-08    | dimensionless                      |
| k90  | 0.00104135  | nM <sup>-1</sup>                   |
| k91  | 6.00E-09    | nM <sup>-1</sup> min <sup>-1</sup> |
| k92  | 0.834749    | nM <sup>-1</sup> min <sup>-1</sup> |
| k93  | 0.162221    | min <sup>-1</sup>                  |
| k94  | 0.954199    | nM <sup>-1</sup> min <sup>-1</sup> |
| k95  | 0.62167     | min <sup>-1</sup>                  |
| k96  | 18.5703     | nM <sup>-3</sup>                   |
| k97  | 41.8866     | dimensionless                      |
| k98  | 0.000128926 | nM <sup>-1</sup>                   |
| k99  | 449.12      | dimensionless                      |
| k100 | 0.182554    | nM <sup>-1</sup>                   |
| k101 | 0.04        | nM <sup>-3</sup>                   |
| k102 | 55.1036     | nMmin <sup>-1</sup>                |
| k103 | 1           | min <sup>-1</sup>                  |
| k104 | 0.01        | min <sup>-1</sup>                  |
| k105 | 0.420909    | min <sup>-1</sup>                  |
| k106 | 0.121509    | min <sup>-1</sup>                  |
| k107 | 0.00796542  | min <sup>-1</sup>                  |
| k108 | 0.00692448  | min <sup>-1</sup>                  |
| k109 | 0.00817427  | min <sup>-1</sup>                  |
| k110 | 0.830381    | min <sup>-1</sup>                  |
| k111 | 0.0015      | min <sup>-1</sup>                  |
| k112 | 0.001       | nM <sup>-1</sup> min <sup>-1</sup> |
| k113 | 1           | nM <sup>-1</sup> min <sup>-1</sup> |
| k114 | 0.04        | nM <sup>-1</sup> min <sup>-1</sup> |
| k115 | 20          | dimensionless                      |
| k116 | 0.59        | min <sup>-1</sup>                  |
| k117 | 0.02        | nM <sup>-1</sup> min <sup>-1</sup> |
| k118 | 1.00E-06    | nMmin <sup>-1</sup>                |

|      |          |                                    |
|------|----------|------------------------------------|
| k119 | 1.00E-06 | nM <sup>-1</sup>                   |
| k120 | 0.76     | nM <sup>-1</sup>                   |
| k121 | 0.89     | min <sup>-1</sup>                  |
| k122 | 600      | nM <sup>-1</sup> min <sup>-1</sup> |
| k123 | 600      | nM <sup>-1</sup> min <sup>-1</sup> |
| k124 | 1        | min <sup>-1</sup>                  |
| k125 | 0.1      | nM                                 |
| k126 | 0.5      | min <sup>-1</sup>                  |
| k127 | 0.01     | min <sup>-1</sup>                  |
| k128 | 0.05     | min <sup>-1</sup>                  |
| k129 | 0.1      | nM <sup>-1</sup> min <sup>-1</sup> |
| k130 | 0.1      | nM <sup>-1</sup> min <sup>-1</sup> |
| k131 | 0.01     | min <sup>-1</sup>                  |
| k132 | 0.01     | min <sup>-1</sup>                  |
| k133 | 600      | nM <sup>-1</sup> min <sup>-1</sup> |
| k134 | 1        | nM <sup>-1</sup> min <sup>-1</sup> |
| k135 | 81       | dimensionless                      |
| k136 | 0.18     | nM <sup>-1</sup>                   |
| k137 | 0.001    | nM <sup>-1</sup>                   |
| k138 | 5        | nM <sup>-1</sup> min <sup>-1</sup> |
| k139 | 0.4      | min <sup>-1</sup>                  |
| k140 | 0.392884 | min <sup>-1</sup>                  |
| k141 | 0.001    | min <sup>-1</sup>                  |
| k142 | 0.11     | nM <sup>-1</sup> min <sup>-1</sup> |
| k143 | 0.012    | nM <sup>-1</sup> min <sup>-1</sup> |
| k144 | 0.01     | nM <sup>-1</sup> min <sup>-1</sup> |
| k145 | 0.79     | min <sup>-1</sup>                  |
| k146 | 0.01     | nM <sup>-1</sup> min <sup>-1</sup> |
| k147 | 0.01     | nM <sup>-1</sup> min <sup>-1</sup> |
| k148 | 0.81     | nM <sup>-1</sup> min <sup>-1</sup> |
| k149 | 0.76     | min <sup>-1</sup>                  |
| k150 | 0.001    | nM <sup>-1</sup>                   |
| k151 | 0.1      | min <sup>-1</sup>                  |
| k152 | 0.001    | nM <sup>-1</sup> min <sup>-1</sup> |
| k153 | 0.001    | nM <sup>-1</sup>                   |
| k154 | 0.1      | nM <sup>-1</sup> min <sup>-1</sup> |
| k155 | 0.1      | nM <sup>-1</sup> min <sup>-1</sup> |
| k156 | 0.04     | min <sup>-1</sup>                  |
